# Supplementary material for: Climate Warming in Response to Emission Reductions Consistent with the Paris Agreement
Source: Hindawi journal article supplement (doi:10.1155/2018/2487962), 2018-01-01
Supplement: f1 [file 2487962.f1.pdf]

**Supplementary Table S1** National mitigation objectives included in INDCs from Jan. 2015 to Jul. 2017

| Country                               | Submitted Date | GHG Reduction Target                                                                                                                                                   |                                                                         | Quantified |
|---------------------------------------|----------------|------------------------------------------------------------------------------------------------------------------------------------------------------------------------|-------------------------------------------------------------------------|------------|
|                                       |                | Unconditional                                                                                                                                                          | Conditional                                                             |            |
| <b>Asia</b>                           |                |                                                                                                                                                                        |                                                                         |            |
| Afghanistan                           | Oct., 2015     | No                                                                                                                                                                     | 13.6% below baseline scenario in 2030                                   | Yes        |
| Bahrain                               | Nov., 2015     | Actions only                                                                                                                                                           | No                                                                      | No         |
| Bangladesh                            | Sep., 2015     | 5% below baseline scenario in 2030 in the power, transport and industry sectors                                                                                        | 15% below baseline scenario in 2030                                     | Yes        |
| Bhutan                                | Oct., 2015     | ≤ 6.3 MtCO <sub>2</sub> -eq by 2030 for CO <sub>2</sub>                                                                                                                | No                                                                      | Yes        |
| Brunei                                | Dec., 2015     | Energy sector 63% below baseline scenario in 2035; Land Transport sector to reduce emissions from morning peak hour vehicle use by 40% below baseline scenario in 2035 | No                                                                      | Yes        |
| Cambodia                              | Sep., 2015     | No                                                                                                                                                                     | 27% below baseline scenario in 2030                                     | Yes        |
| China                                 | Jul., 2015     | 60-65% emission intensity by 2030 compared to 2005 levels                                                                                                              | No                                                                      | Yes        |
| Democratic People's Republic of Korea | Oct., 2016     | 8% below baseline scenario in 2030                                                                                                                                     | 32.25% below baseline scenario in 2030                                  | Yes        |
| Dominica                              | Oct., 2015     | No                                                                                                                                                                     | 17.9% by 2020; 39.2% by 2025; and 44.7% by 2030 compared to 2014 levels | Yes        |
| Dominican Republic                    | Aug., 2015     | No                                                                                                                                                                     | 25% by 2030 compared to 2010 level                                      | Yes        |
| India                                 | Oct., 2015     | No                                                                                                                                                                     | Emission intensity 33-35% by 2030 compared to 2005 levels               | Yes        |
| Indonesia                             | Sep., 2015     | 29% below baseline scenario in 2030                                                                                                                                    | 41% below baseline scenario in 2030                                     | Yes        |
| Iran                                  | Nov., 2015     | 4% below baseline scenario in 2030                                                                                                                                     | 12% below baseline scenario in 2030                                     | Yes        |
| Iraq                                  | Nov., 2015     | 13% below baseline scenario in 2035                                                                                                                                    | 15% below baseline scenario in 2035                                     | Yes        |

|                   |            |                                                          |                                                        |     |
|-------------------|------------|----------------------------------------------------------|--------------------------------------------------------|-----|
| Israel            | Oct., 2015 | per capita emissions to 7.7 tCO <sub>2</sub> -eq by 2030 | No                                                     | Yes |
| Japan             | Jul., 2015 | 26% by 2030 compared to 2013 level                       | No                                                     | Yes |
| Jordan            | Oct., 2015 | 1.5% below baseline scenario in 2030                     | 14% below baseline scenario in 2030                    | Yes |
| Kazakhstan        | Sep., 2015 | 15% by 2030 compared to 1990 levels                      | 25% by 2030 compared to 1990 levels                    | Yes |
| Kuwait            | Nov., 2015 | Actions only                                             | No                                                     | No  |
| Kyrgyzstan        | Oct., 2015 | 11.49-13.75% below baseline scenario in 2030             | 29-30.9% below baseline scenario in 2030               | Yes |
| Laos              | Oct., 2015 | No                                                       | Actions only                                           | No  |
| Lebanon           | Oct., 2015 | 15% below baseline scenario in 2030                      | 30% below baseline scenario in 2030                    | Yes |
| Malaysia          | Jan., 2016 | Emission intensity 35% by 2030 compared to 2005 levels   | Emission intensity 45% by 2030 compared to 2005 levels | Yes |
| Maldives          | Sep., 2015 | 10% below baseline scenario in 2030                      | 24% below baseline scenario in 2030                    | Yes |
| Mongolia          | Sep., 2015 | No                                                       | 14% below baseline scenario in 2030                    | Yes |
| Myanmar           | Sep., 2015 | Actions only                                             | No                                                     | No  |
| Nepal             | Feb., 2016 | Non-GHG target and actions                               | No                                                     | No  |
| Oman              | Oct., 2015 | 2% below baseline scenario in 2030                       | No                                                     | Yes |
| Pakistan          | Nov., 2016 | No                                                       | 20% below baseline scenario in 2030                    | Yes |
| Philippines       | Oct., 2015 | No                                                       | 70% below baseline scenario in 2030                    | Yes |
| Qatar             | Nov., 2015 | Actions only                                             |                                                        | No  |
| Republic of Korea | Jun., 2015 | 37% below baseline scenario in 2030                      | No                                                     | Yes |
| Saudi Arabia      | Nov., 2015 | Actions only                                             |                                                        | No  |
| Singapore         | Jul., 2015 | 36% emission intensity by 2030 compared to 2005 levels   | No                                                     | Yes |
| Sri Lanka         | Apr., 2016 | 7% below baseline scenario in 2030                       | 23% below baseline scenario in 2030                    | Yes |
| Sri Lanka         | Oct., 2015 | 7% below baseline scenario in 2030                       | 23% below baseline scenario in 2030                    | Yes |
| Tajikistan        | Sep., 2015 | 10-20% by 2030 compared to 1990 levels                   | 25-35% by 2030 compared to 1990 levels                 | Yes |
| Thailand          | Oct., 2015 | 20% below baseline scenario in 2030                      | 25% below baseline scenario in 2030                    | Yes |

|                          |            |                                                        |                                       |     |
|--------------------------|------------|--------------------------------------------------------|---------------------------------------|-----|
| Timor-Leste              | Mar., 2017 | Sector actions                                         | No                                    | No  |
| Turkmenistan             | Oct., 2015 | No                                                     | Emission peaks by 2030                | Yes |
| United Arab Emirates     | Oct., 2015 | Renewable energy target                                | No                                    | No  |
| Uzbekistan               | Apr., 2017 | 10% emission intensity by 2030 compared to 2010 levels | No                                    | Yes |
| Vietnam                  | Oct., 2015 | 8% below baseline scenario in 2030                     | 25% below baseline scenario in 2030   | Yes |
| Yemen                    | Nov., 2015 | 1% below baseline scenario in 2030                     | 14% below baseline scenario in 2030   | Yes |
| <b>Africa</b>            |            |                                                        |                                       |     |
| Algeria                  | Sep., 2015 | 7% below baseline scenario in 2030                     | 22% below baseline scenario in 2030   | Yes |
| Angola                   | Nov., 2015 | 35% below baseline scenario in 2030                    | 50% below baseline scenario in 2030   | Yes |
| Benin                    | Aug., 2015 | No                                                     | 21.4% below baseline scenario in 2030 | Yes |
| Botswana                 | Oct., 2015 | 15% by 2030 compared to 2010 levels                    | No                                    | Yes |
| Burkina Faso             | Oct., 2015 | 6.6% below baseline scenario in 2030                   | 18.2% below baseline scenario in 2030 | Yes |
| Burundi                  | Nov., 2015 | 3% below baseline scenario in 2030                     | 20% below baseline scenario in 2030   | Yes |
| Cabo Verde               | Sep., 2015 | Renewable Energy and Energy; Efficiency Targets        | No                                    | No  |
| Cameroon                 | Sep., 2015 | No                                                     | 32% below baseline scenario in 2030   | Yes |
| Central African Republic | Sep., 2015 | No                                                     | 5% below baseline scenario in 2030    | Yes |
| Chad                     | Sep., 2015 | 18.2% below baseline scenario in 2030                  | 71% below baseline scenario in 2030   | Yes |
| Comoros                  | Sep., 2015 | No                                                     | 84% below baseline scenario in 2030   | Yes |
| Congo                    | Oct., 2015 | No                                                     | 48% below baseline scenario in 2025   | Yes |
| Cote d'Ivoire            | Sep., 2015 | 28% below baseline scenario in 2030                    | No                                    | Yes |
| Dem. Republic of Congo   | Aug., 2015 | No                                                     | 17% below baseline scenario in 2030   | Yes |
| Djibouti                 | Oct., 2015 | 40% below baseline scenario in 2030                    | 60% below baseline scenario in 2030   | Yes |
| Egypt                    | Nov., 2015 | Actions only                                           | No                                    | No  |
| Equatorial Guinea        | Sep., 2015 | No                                                     | 20% by 2030 compared to 2010 level    | Yes |

|                       |            |                                                    |                                                                                |     |
|-----------------------|------------|----------------------------------------------------|--------------------------------------------------------------------------------|-----|
| Eritrea               | Sep., 2015 | 39.2% below baseline scenario in 2030              | 80.6% below baseline scenario in 2030                                          | Yes |
| Ethiopia              | Jun., 2015 | ≤ 145 Mt CO <sub>2</sub> -eq net emissions in 2030 | No                                                                             | Yes |
| Gabon                 | Apr., 2015 | ≥ 50% below baseline scenario in 2025              | No                                                                             | Yes |
| Gambia                | Sep., 2015 | No                                                 | Actions only                                                                   | No  |
| Ghana                 | Sep., 2015 | 15% below baseline scenario in 2030                | 45% below baseline scenario in 2030                                            | Yes |
| Guinea                | Oct., 2015 | No                                                 | 13% by 2030 compared to 1994 level                                             | Yes |
| Guinea-Bissau         | Sep., 2015 | No                                                 | Actions only                                                                   | No  |
| Kenya                 | Jul., 2015 | No                                                 | 30% below baseline scenario in 2030                                            | Yes |
| Lesotho               | Sep., 2015 | 10% below baseline scenario in 2030                | 35% below baseline scenario in 2030                                            | Yes |
| Liberia               | Sep., 2015 | No                                                 | 10% below baseline scenario in 2030                                            | Yes |
| Madagascar            | Sep., 2015 | No                                                 | 14% below baseline scenario in 2030                                            | Yes |
| Malawi                | Oct., 2015 | Actions only                                       | Actions only                                                                   | No  |
| Mali                  | Sep., 2015 | No                                                 | 29% (agriculture), 31% (energy), 21% (LUCF)<br>below baseline scenario in 2030 | Yes |
| Mauritania            | Sep., 2015 | No                                                 | 22.3% below baseline scenario in 2030                                          | Yes |
| Mauritius             | Sep., 2015 | No                                                 | 30% below baseline scenario in 2030                                            | Yes |
| Morocco               | Jun., 2015 | 13% below baseline scenario in 2030                | 32% below baseline scenario in 2030                                            | Yes |
| Mozambique            | Oct., 2015 | No                                                 | Actions only                                                                   | No  |
| Namibia               | Sep., 2015 | No                                                 | 89% below baseline scenario in 2030                                            | Yes |
| Niger                 | Sep., 2015 | 3.5% below baseline scenario in 2030               | 34.6% below baseline scenario in 2030                                          | Yes |
| Nigeria               | Nov., 2015 | 20% below baseline scenario in 2030                | 45% below baseline scenario in 2030                                            | Yes |
| Rwanda                | Dec., 2015 | Actions only                                       | No                                                                             | No  |
| Sao Tome and Principe | Sep., 2015 | No                                                 | 24% by 2030 compared to 2005 levels                                            | Yes |
| Senegal               | Sep., 2015 | 4%, 7%, 6% below baseline scenario in 2030         | 10%, 23%, 31% below baseline scenario in<br>2030                               | Yes |

|                        |            |                                                                                                                                  |                                                                     |     |
|------------------------|------------|----------------------------------------------------------------------------------------------------------------------------------|---------------------------------------------------------------------|-----|
| Seychelles             | Sep., 2015 | 122.5 ktCO <sub>2</sub> -eq (21.4%) in 2025 and estimated 188 ktCO <sub>2</sub> e in 2030 (29.0%) relative to baseline emissions | No                                                                  | Yes |
| Sierra Leone           | Oct., 2015 | net emissions of 7.58 MtCO <sub>2</sub> -eq by 2035                                                                              | No                                                                  | Yes |
| Somalia                | Nov., 2015 | Actions only                                                                                                                     | No                                                                  | No  |
| South Africa           | Sep., 2015 | Trajectory target, 398-614 Mt CO <sub>2</sub> -eq for 2025-2030                                                                  | No                                                                  | Yes |
| South Sudan            | Nov., 2015 | Actions only                                                                                                                     | No                                                                  | No  |
| Sudan                  | Nov., 2015 | 3 sectors target                                                                                                                 | No                                                                  | No  |
| Swaziland              | Sep., 2015 | No                                                                                                                               | Actions only                                                        | No  |
| Tanzania               | Oct., 2015 | 10-20% below baseline scenario in 2030                                                                                           | No                                                                  | Yes |
| Togo                   | Oct., 2015 | 11.14% below baseline scenario in 2030                                                                                           | 31.14% below baseline scenario in 2030                              | Yes |
| Tunisia                | Sep., 2015 | 13% by 2030 compared to 2010 levels                                                                                              | 41% by 2030 compared to 2010 levels                                 | Yes |
| Uganda                 | Oct., 2015 | Actions only                                                                                                                     |                                                                     | No  |
| Zambia                 | Sep., 2015 | 25% by 2030 compared to 2010 levels                                                                                              | 47% by 2030 compared to 2010 levels                                 | Yes |
| Zimbabwe               | Sep., 2015 | No                                                                                                                               | 33% below baseline scenario in 2030                                 | Yes |
| <b>Europe</b>          |            |                                                                                                                                  |                                                                     |     |
| EU28                   | Mar., 2015 | ≥ 40% by 2030 compared to 1990 levels                                                                                            | No                                                                  | Yes |
| Albania                | Sep., 2015 | 11.5% below baseline scenario in 2030 (CO <sub>2</sub> )                                                                         | No                                                                  | Yes |
| Andorra                | Apr., 2015 | 37% below baseline scenario in 2030                                                                                              | No                                                                  | Yes |
| Armenia                | Sep., 2015 | No                                                                                                                               | total aggregate emissions, 633 Mt CO <sub>2</sub> -eq for 2015-2030 | Yes |
| Azerbaijan             | Sep., 2015 | 35% by 2030 compared to 1990 levels                                                                                              | No                                                                  | Yes |
| Belarus                | Sep., 2015 | 28% by 2030 compared to 1990 levels                                                                                              | No                                                                  | Yes |
| Bosnia and Herzegovina | Oct., 2015 | 20% below baseline scenario in 2030                                                                                              | 23% below baseline scenario in 2030                                 | Yes |
| Georgia                | Sep., 2015 | 15% below baseline scenario in 2030                                                                                              | 25% below baseline scenario in 2030                                 | Yes |

|                    |             |                                                        |                                       |     |
|--------------------|-------------|--------------------------------------------------------|---------------------------------------|-----|
| Iceland            | Jun., 2015  | 40% by 2030 compared to 1990 levels                    | No                                    | Yes |
| Liechtenstein      | Apr., 2015  | 40% by 2030 compared to 1990 levels                    | No                                    | Yes |
| Macedonia          | Aug., 2015  | 30% below baseline scenario in 2030 (CO <sub>2</sub> ) | 36% below baseline scenario in 2030   | Yes |
| Moldova            | Sep., 2015  | 64-67% by 2030 compared to 1990 levels                 | 78% by 2030 compared to 1990 levels   | Yes |
| Monaco             | Aug., 2015  | 50% by 2030 compared to 1990 levels                    | No                                    | Yes |
| Montenegro         | Sept., 2015 | 30% by 2030 compared to 1990 levels                    | No                                    | Yes |
| Norway             | Mar., 2015  | ≥ 40% by 2030 compared to 1990 levels                  | No                                    | Yes |
| Republic of Serbia | Jul., 2015  | 9.8% by 2030 compared to 1990 levels                   | No                                    | Yes |
| Russian Federation | Apr., 2015  | 25-30% by 2030 compared to 1990 levels                 | No                                    | Yes |
| San Marino         | Sep., 2015  | 20% by 2030 compared to 2005 levels                    | No                                    | Yes |
| Switzerland        | Feb., 2015  | 50% by 2030 compared to 1990 levels                    | No                                    | Yes |
| Turkey             | Sep., 2015  | 21% below baseline scenario in 2030                    | No                                    | Yes |
| Ukraine            | Sept., 2015 | 40% by 2030 compared to 1990 levels                    | No                                    | Yes |
| <b>Oceania</b>     |             |                                                        |                                       |     |
| Australia          | Aug., 2015  | 26-28% by 2030 compared to 2005 level                  | No                                    | Yes |
| Cook Islands       | Nov., 2015  | Renewable energy target                                | No                                    | No  |
| Fiji               | Nov., 2015  | Energy sector 30% below baseline scenario in 2030      | No                                    | Yes |
| Kiribati           | Sep., 2015  | 12.8% below baseline scenario in 2030                  | 61.8% below baseline scenario in 2030 | Yes |
| Marshall Island    | Jul., 2015  | 32% by 2025 and 45% by 2030 compared to 2010 level     | No                                    | Yes |
| Micronesia         | Nov., 2015  | 28% by 2025 compared to 2000 level                     | 35% by 2025 compared to 2000 level    | Yes |
| Nauru              | Nov., 2015  | Actions only                                           | No                                    | No  |
| New Zealand        | Jul., 2015  | 30% by 2030 compared to 2005 level                     | No                                    | Yes |
| Niue               | Nov., 2015  | Renewable energy 38% by 2020                           | Renewable energy 80% by 2025          | Yes |

|                              |            |                                                                                                                         |                                                                             |     |
|------------------------------|------------|-------------------------------------------------------------------------------------------------------------------------|-----------------------------------------------------------------------------|-----|
| Palau                        | Nov., 2015 | Energy emission 22% below 2005 level in 2025; 45% Renewable Energy target by 2025; 35% Energy Efficiency target by 2025 | No                                                                          | Yes |
| Papua New Guinea             | Sep., 2015 | Non-GHG target and actions                                                                                              | No                                                                          | No  |
| Samoa                        | Oct., 2015 | Renewable energy target                                                                                                 | No                                                                          | No  |
| Solomon Islands              | Sep., 2015 | 12% by 2025 and 30% by 2030 compared to 2015 level                                                                      | 27% by 2025 and 45% by 2030 compared to 2015 level                          | Yes |
| Tonga                        | Dec., 2015 | Renewable energy target                                                                                                 | No                                                                          | No  |
| Tuvalu                       | Nov., 2015 | 60% by 2025 compared to 2010 level                                                                                      | No                                                                          | Yes |
| Vanuatu                      | Sep., 2015 | only renewable energy target                                                                                            | No                                                                          | No  |
| <b>America</b>               |            |                                                                                                                         |                                                                             |     |
| Canada                       | May, 2015  | 30% by 2030 compared to 2005 level                                                                                      | No                                                                          | Yes |
| United States                | Mar., 2015 | 26-28% by 2025 compared to 2005 level                                                                                   | No                                                                          | Yes |
| Saint Vincent and Grenadines | Nov., 2015 | 22% below baseline scenario in 2030                                                                                     | No                                                                          | Yes |
| Antigua and Barbuda          | Oct., 2015 | Actions only                                                                                                            | No                                                                          | No  |
| Saint Lucia                  | Nov., 2015 | 16% by 2025 and 23% by 2030 below baseline scenario                                                                     | No                                                                          | Yes |
| Argentina                    | Oct., 2015 | 15% below baseline scenario in 2030                                                                                     | 30% below baseline scenario in 2030                                         | Yes |
| Barbados                     | Sep., 2015 | 23% by 2030 compared to 2008 level                                                                                      | No                                                                          | Yes |
| Belize                       | Oct., 2015 | No                                                                                                                      | Actions only                                                                | No  |
| Bolivia                      | Oct., 2015 | Renewable energy and LUCF targets                                                                                       | No                                                                          | No  |
| Brazil                       | Sep., 2015 | 37% by 2025 compared to 2005 level                                                                                      | No                                                                          | Yes |
| Chile                        | Jan., 2016 | 30% emission intensity by 2030 compared to 2007 level (CO <sub>2</sub> )                                                | 35-45% emission intensity by 2030 compared to 2007 level (CO <sub>2</sub> ) | Yes |
| Colombia                     | Sep., 2015 | 20% below baseline scenario in 2030                                                                                     | 30% below baseline scenario in 2030                                         | Yes |
| Costa Rica                   | Sep., 2015 | a maximum of 9.374 Mt CO <sub>2</sub> -eq in 2030                                                                       | No                                                                          | Yes |

|                     |            |                                                                                                   |                                                                             |     |
|---------------------|------------|---------------------------------------------------------------------------------------------------|-----------------------------------------------------------------------------|-----|
| Cuba                | Nov., 2015 | Actions only                                                                                      | No                                                                          | No  |
| Ecuador             | Oct., 2015 | 20.4-25 % below baseline scenario in 2025                                                         | 37.5-45.8% below baseline scenario in 2025                                  | Yes |
| El Salvador         | Nov., 2015 | Actions only                                                                                      | No                                                                          | No  |
| Grenada             | Sep., 2015 | 30% by 2025 compared to 2010 level (indicative 40% by 2030)                                       | No                                                                          | Yes |
| Guatemala           | Sep., 2015 | 11.2% below baseline scenario in 2030                                                             | 22.6% below baseline scenario in 2030                                       | Yes |
| Guyana              | Sep., 2015 | No                                                                                                | 52 Mt CO <sub>2</sub> -eq in 2025                                           | Yes |
| Haiti               | Sep., 2015 | 5% below baseline scenario in 2030                                                                | 26% below baseline scenario in 2030                                         | Yes |
| Honduras            | Oct., 2015 | No                                                                                                | 15% below baseline scenario in 2030                                         | Yes |
| Jamaica             | Nov., 2015 | 7.8% below baseline scenario in 2030                                                              | 10% below baseline scenario in 2030                                         | Yes |
| Mexico              | Mar., 2015 | 22% below baseline scenario in 2030                                                               | 36% below baseline scenario in 2030                                         | Yes |
| Panama              | Apr., 2016 | Non-GHG target and actions                                                                        |                                                                             | No  |
| Paraguay            | Oct., 2015 | 10% below baseline scenario in 2030                                                               | 20% below baseline scenario in 2030                                         | Yes |
| Peru                | Sep., 2015 | 20% below baseline scenario in 2030                                                               | 30% below baseline scenario in 2030                                         | Yes |
| St Kitts and Nevis  | Jan., 2016 | No                                                                                                | 22% below baseline scenario in 2025;<br>35% below baseline scenario in 2030 | Yes |
| Suriname            | Oct., 2015 | Actions only                                                                                      | No                                                                          | No  |
| The Bahamas         | Nov., 2015 | No                                                                                                | 30% below baseline scenario in 2030                                         | Yes |
| Trinidad and Tobago | Aug., 2015 | Transportation 30% by 2030 compared to 2013 levels; 3 sectors 15% below baseline scenario in 2030 | No                                                                          | Yes |
| Uruguay             | Sep., 2015 | 8 intensity targets and 1 fixed level target                                                      | No                                                                          | Yes |
| Venezuela           | Dec., 2015 | 20% below baseline scenario in 2030                                                               | No                                                                          | Yes |
